# Supplementary material for: miR-140-3p enhanced the osteo/odontogenic differentiation of DPSCs via inhibiting KMT5B under hypoxia condition
Source: PubMed Central journal article supplement (PMC8651682; doi:10.1038/s41368-021-00148-y), 2021-12-07

**Fig.1a**

HIF

120KD

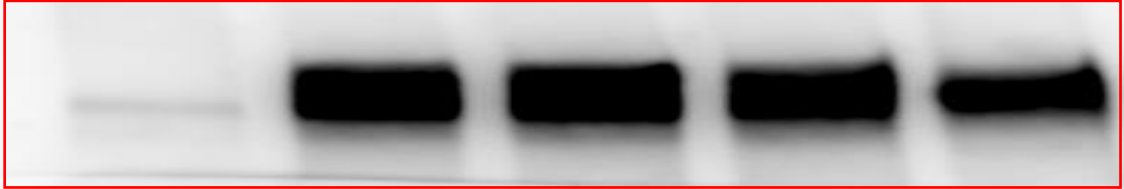

$\beta$ -actin

43KD

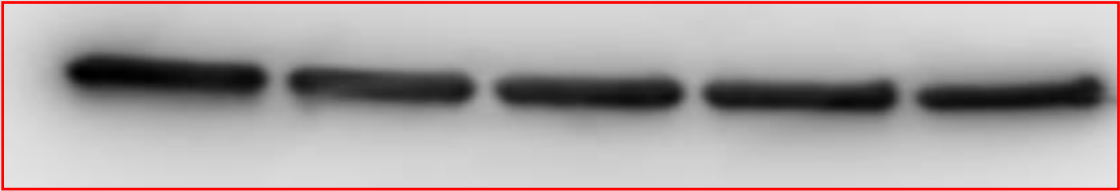

**Fig.2e**

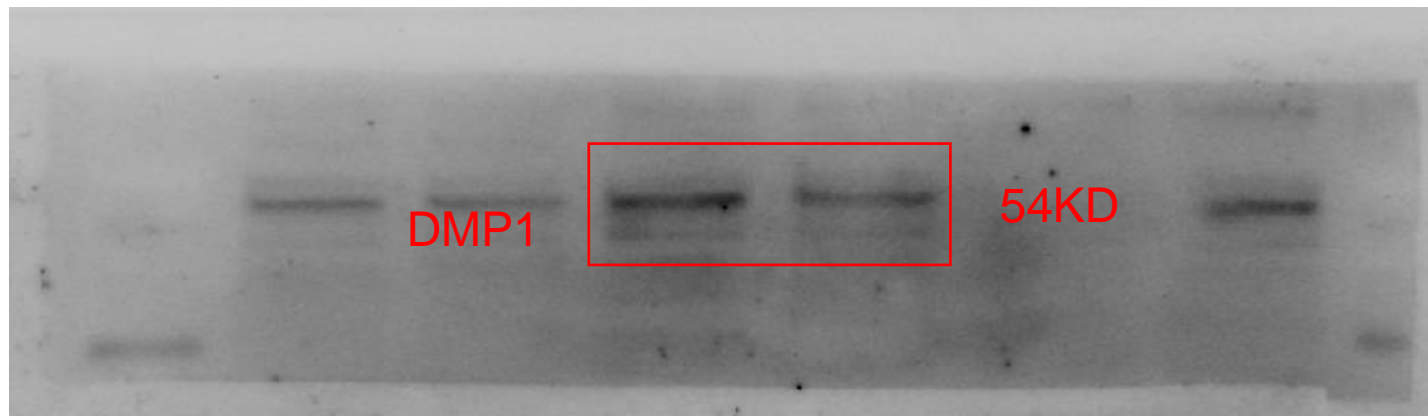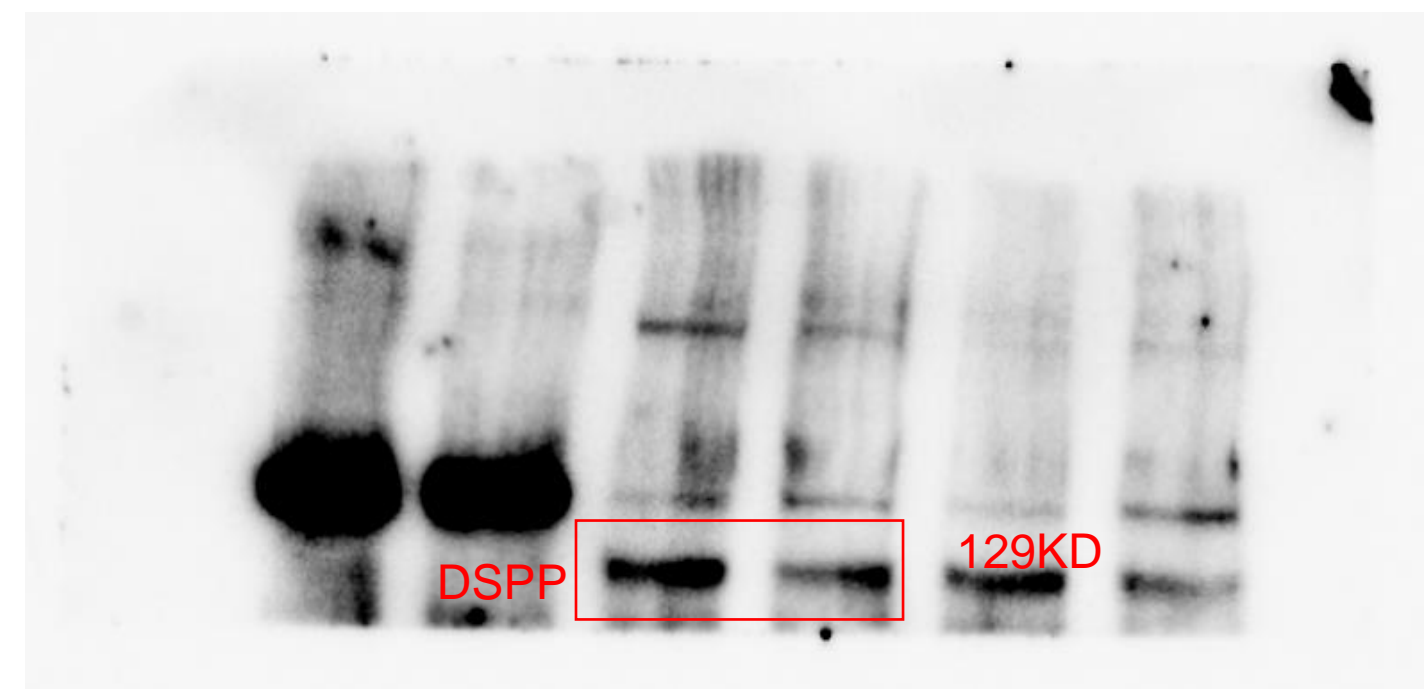

∴

**Fig.2e**

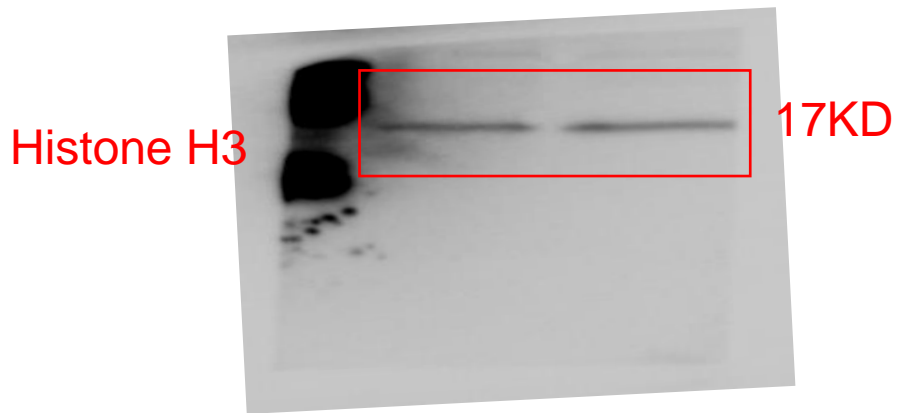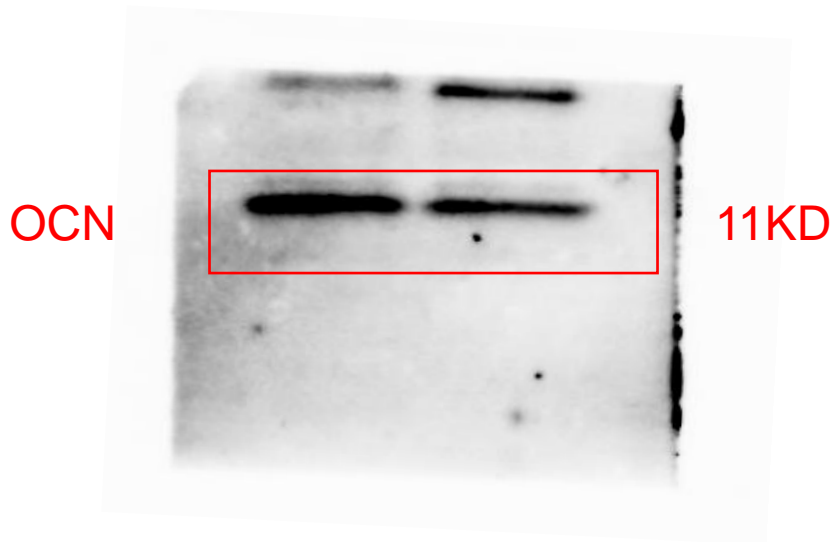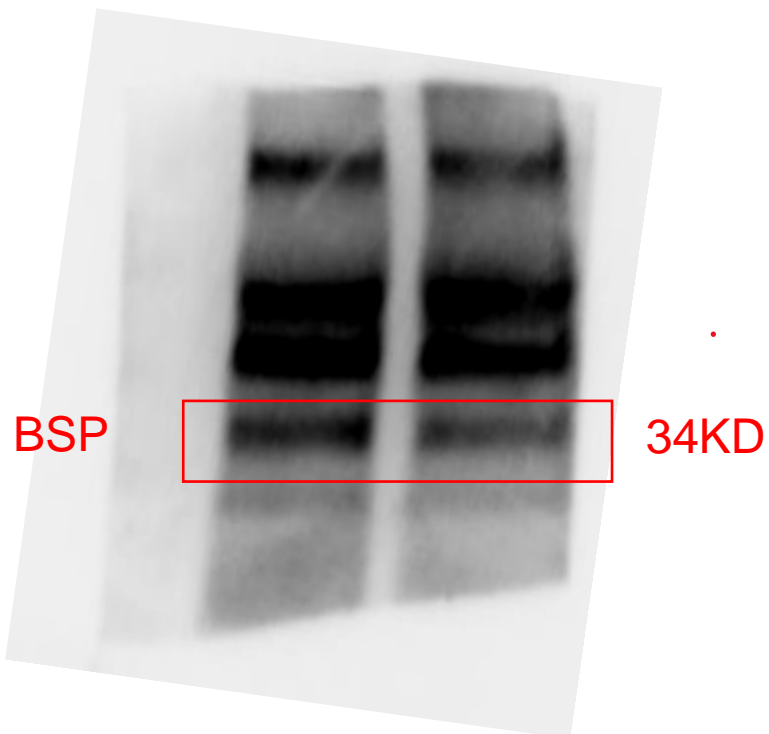

**Fig.3e**

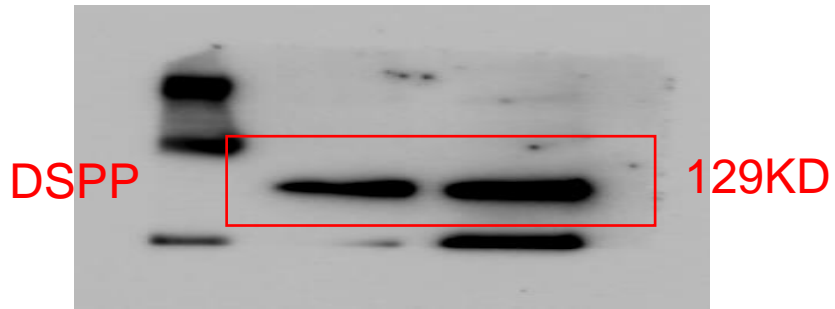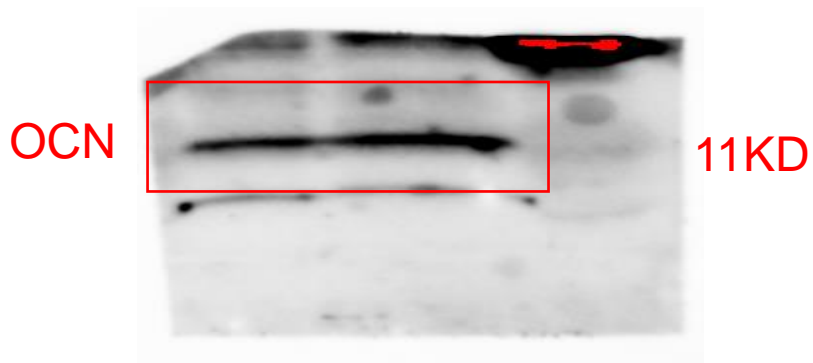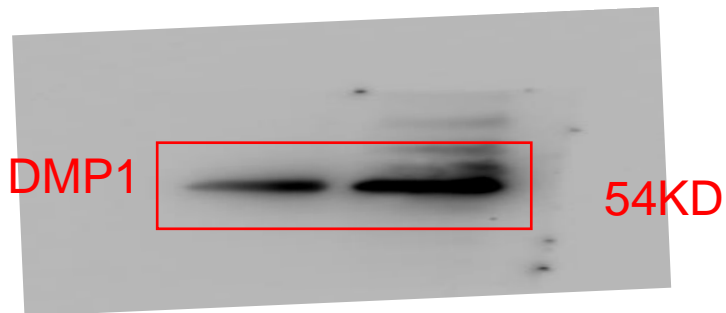

**Fig.3e**

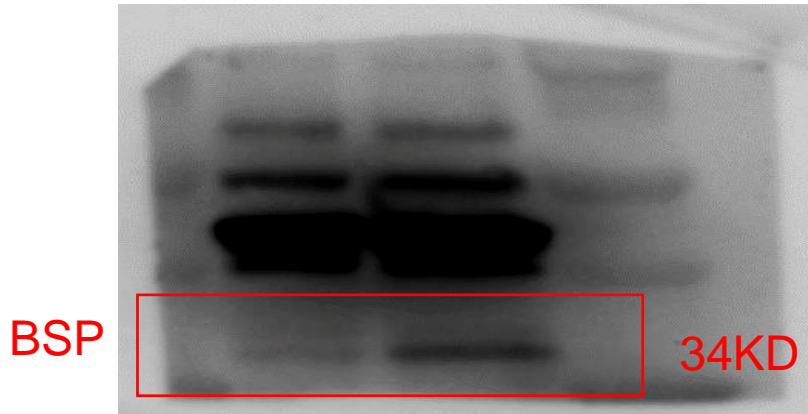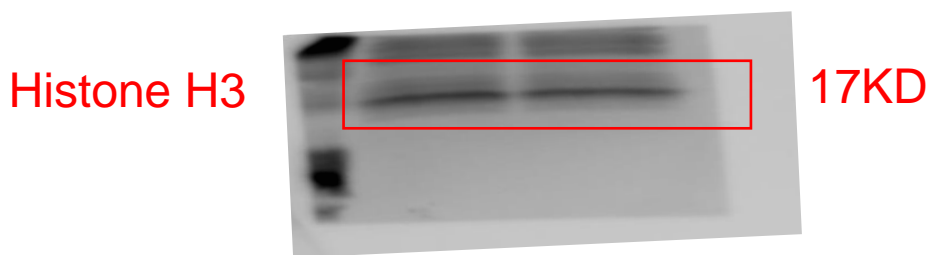

**Fig.3i**

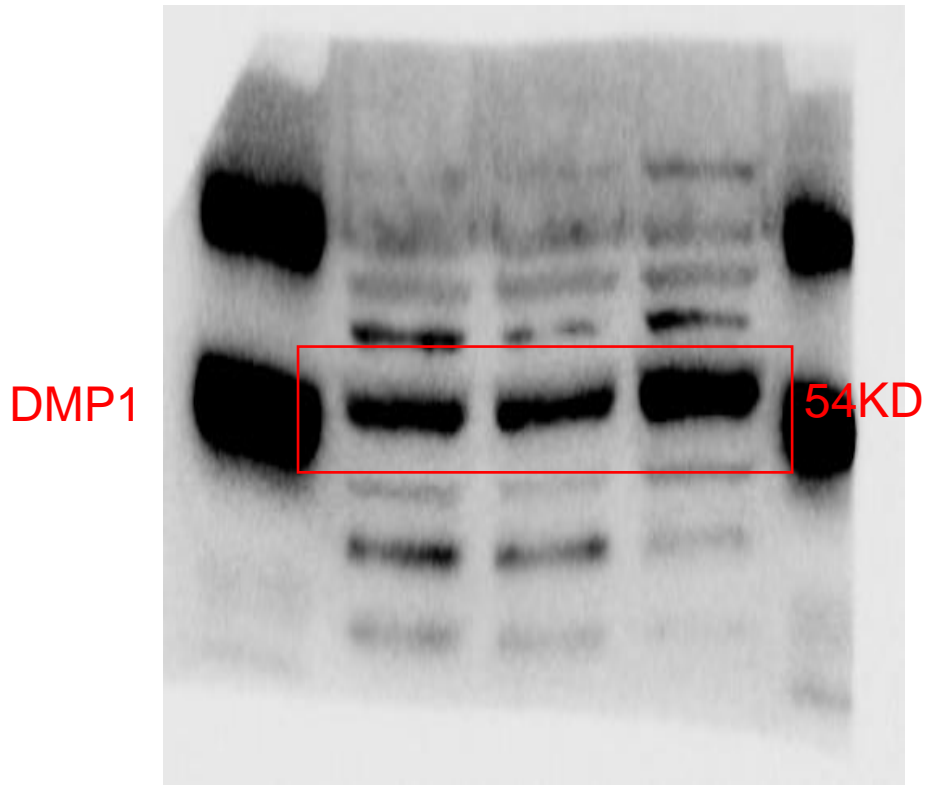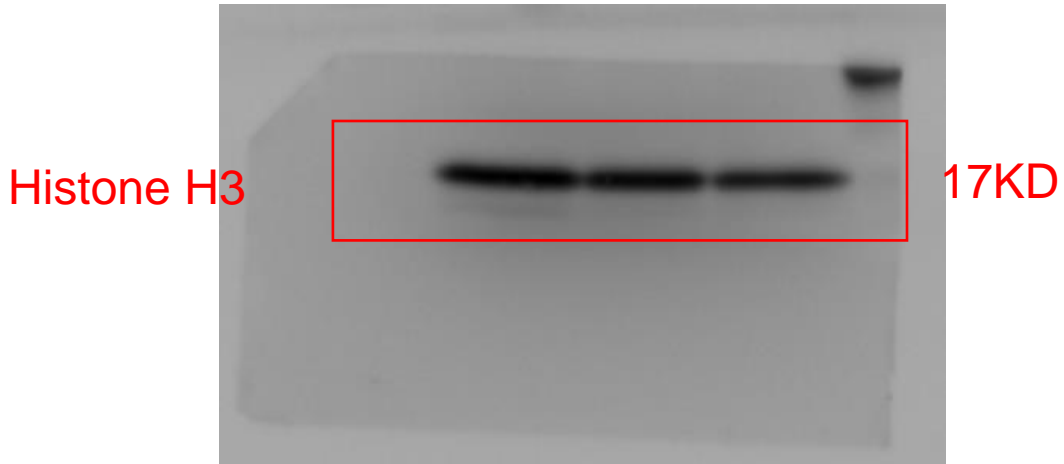

**Fig.3i**

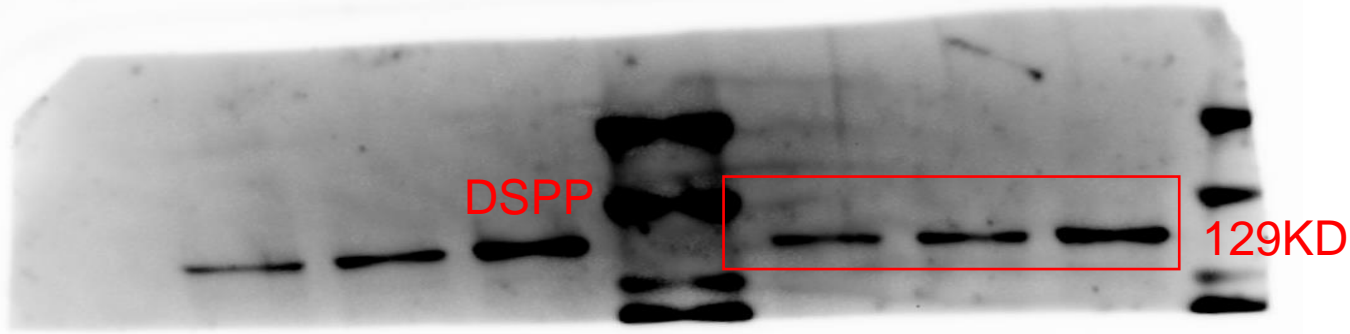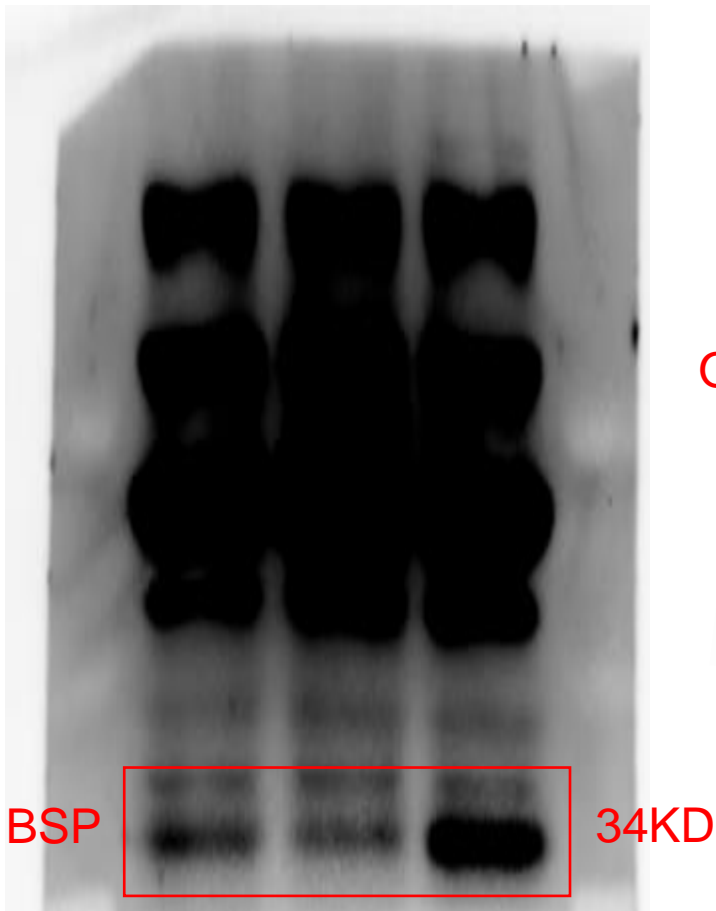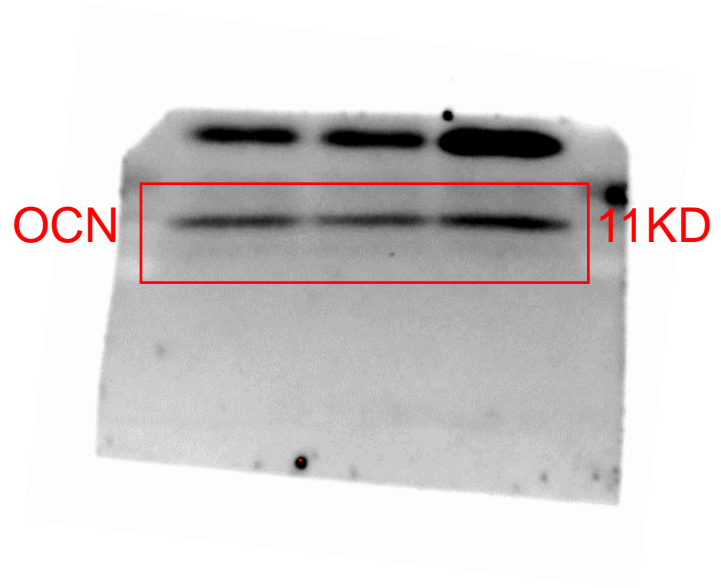

**Fig.5a**

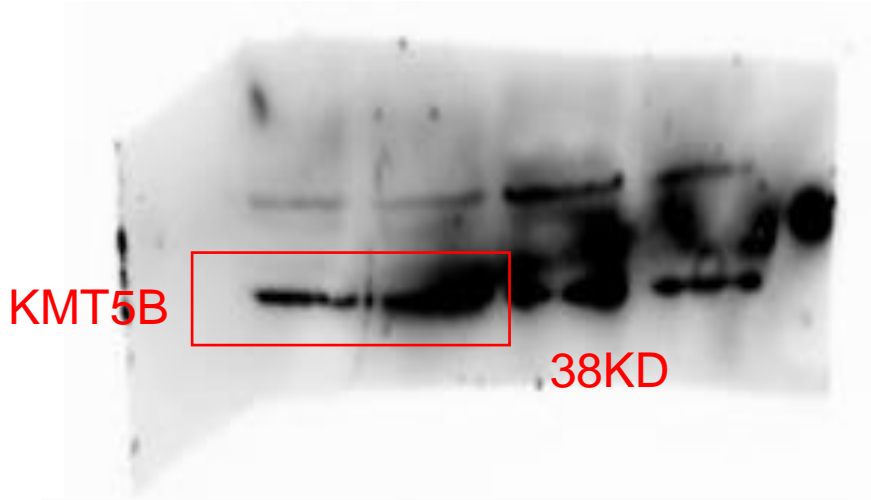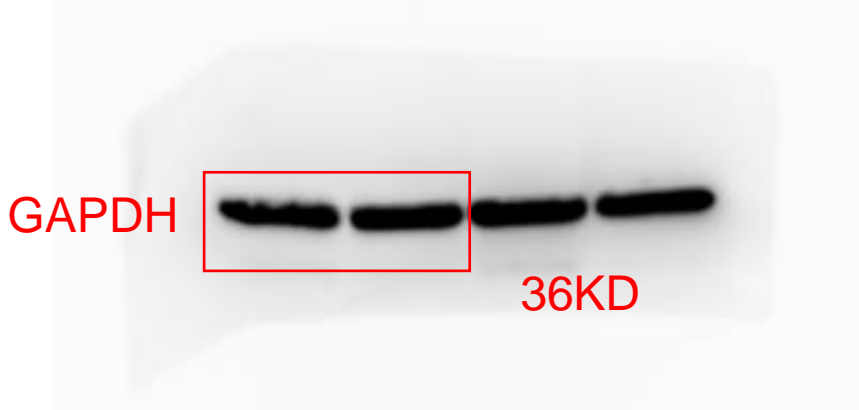



**Fig.5e**

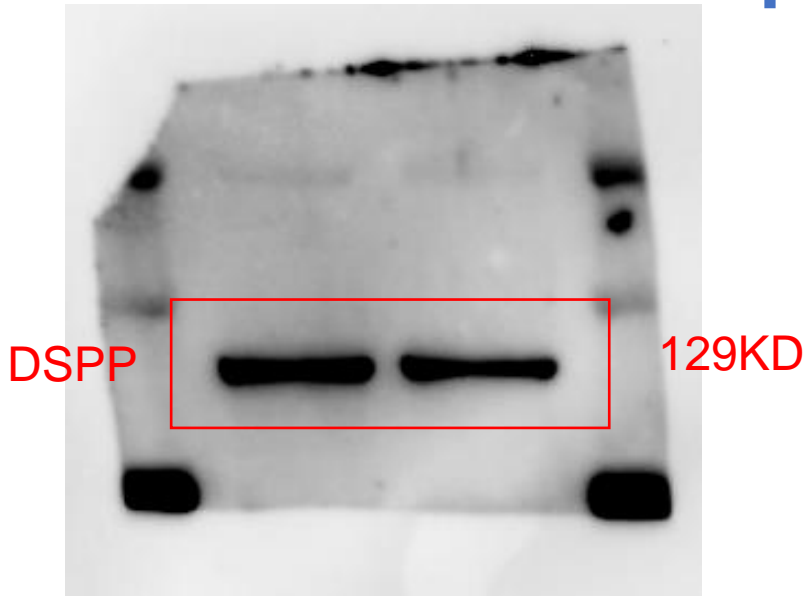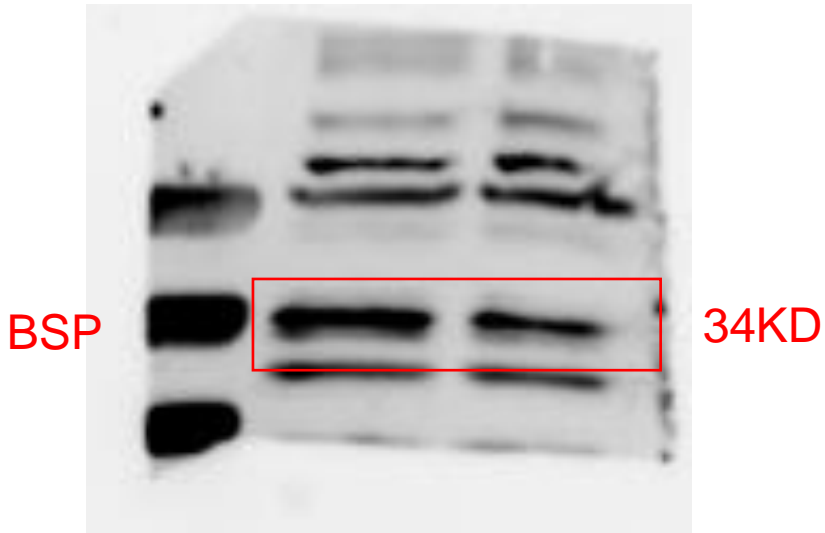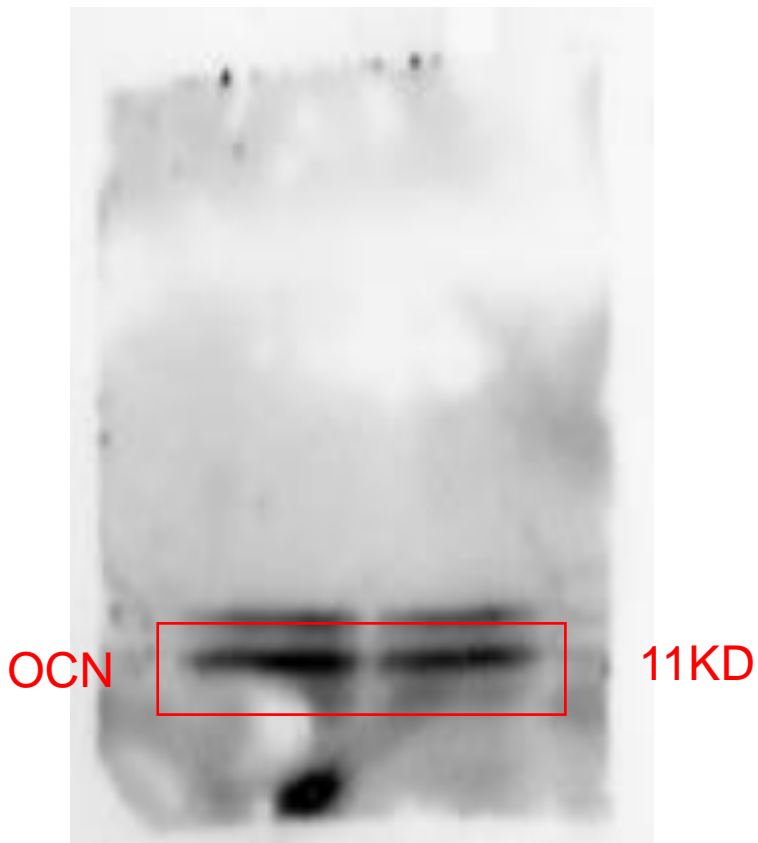

**Fig.5e**

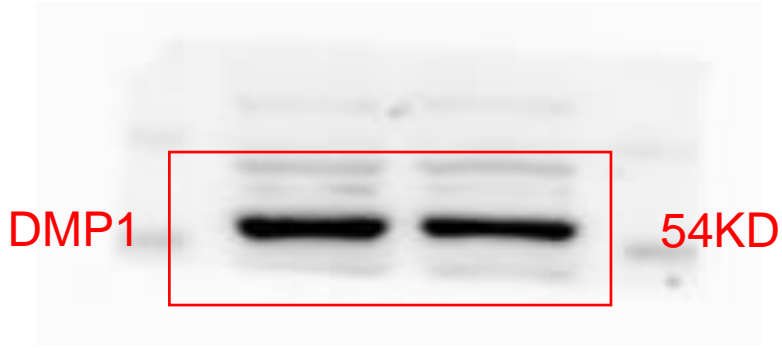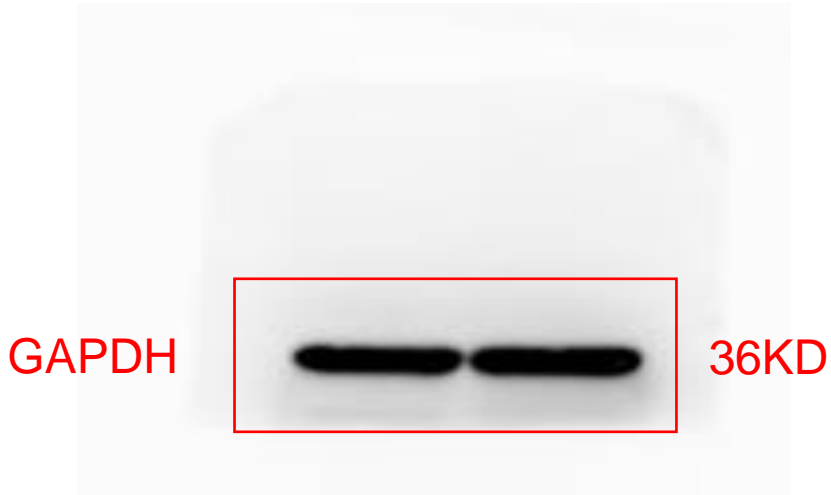

**Fig.6a**

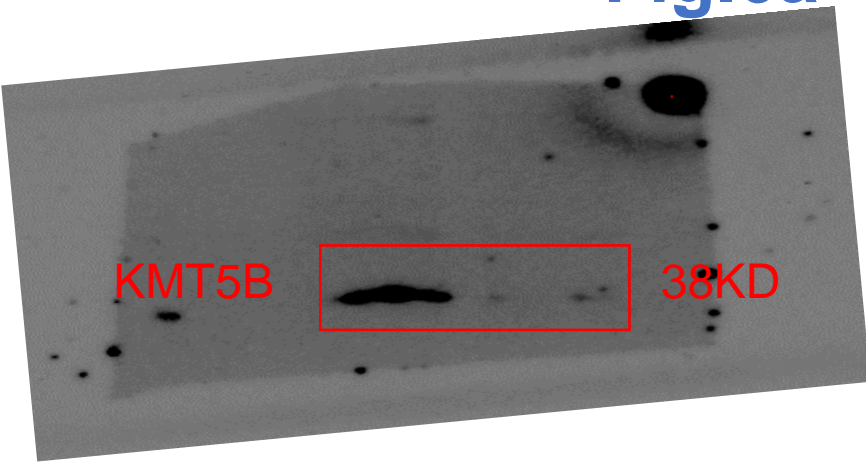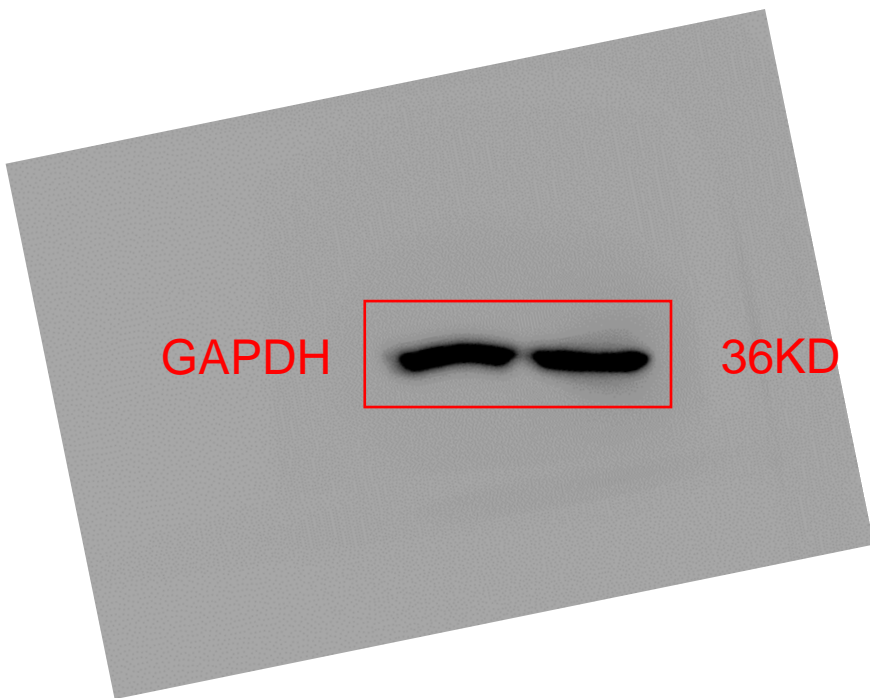

**Fig.6e**

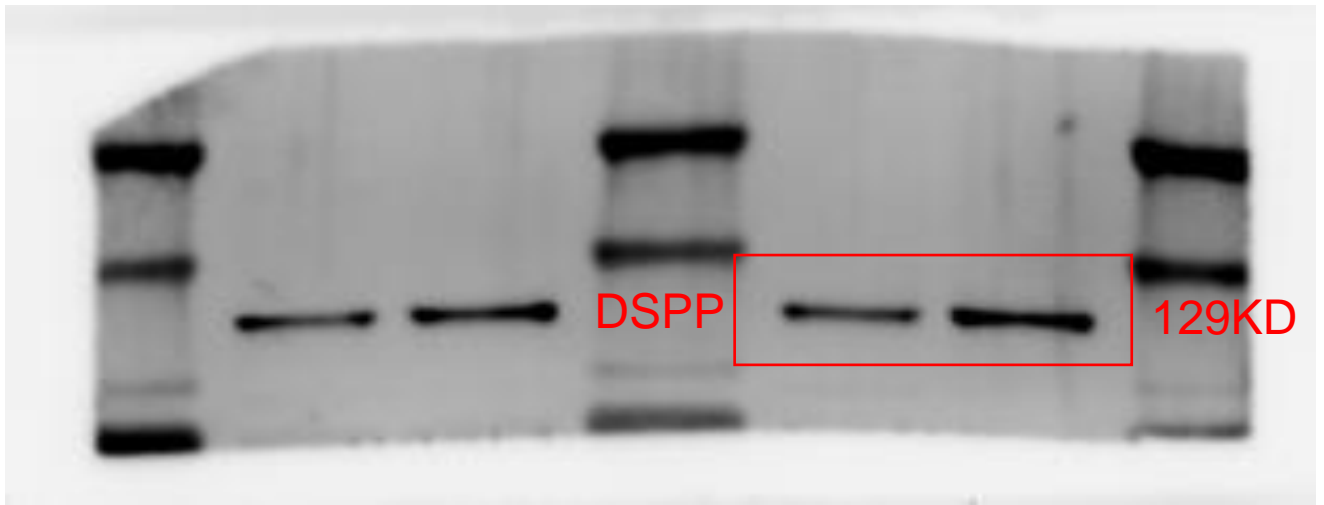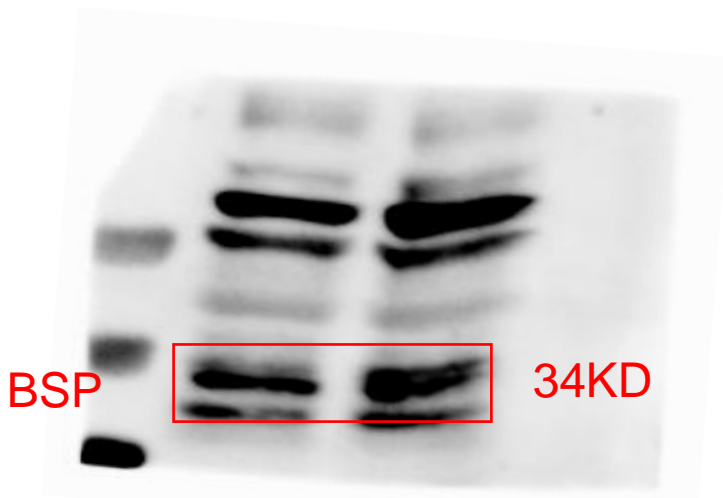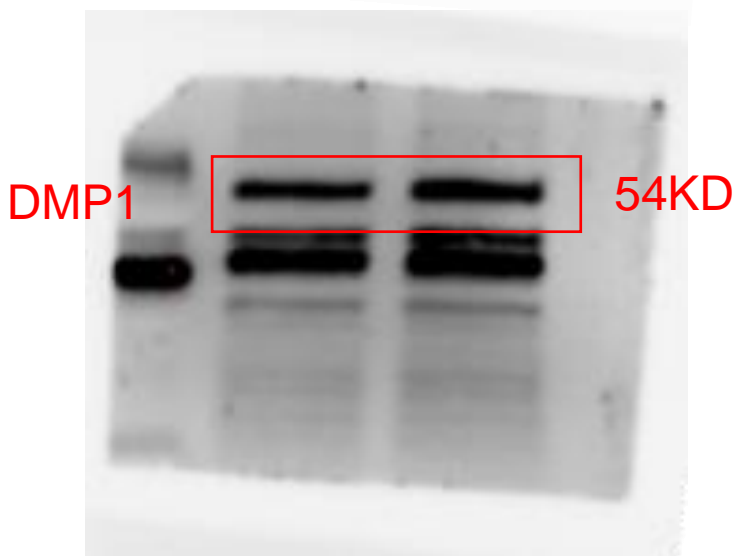

**Fig.6e**

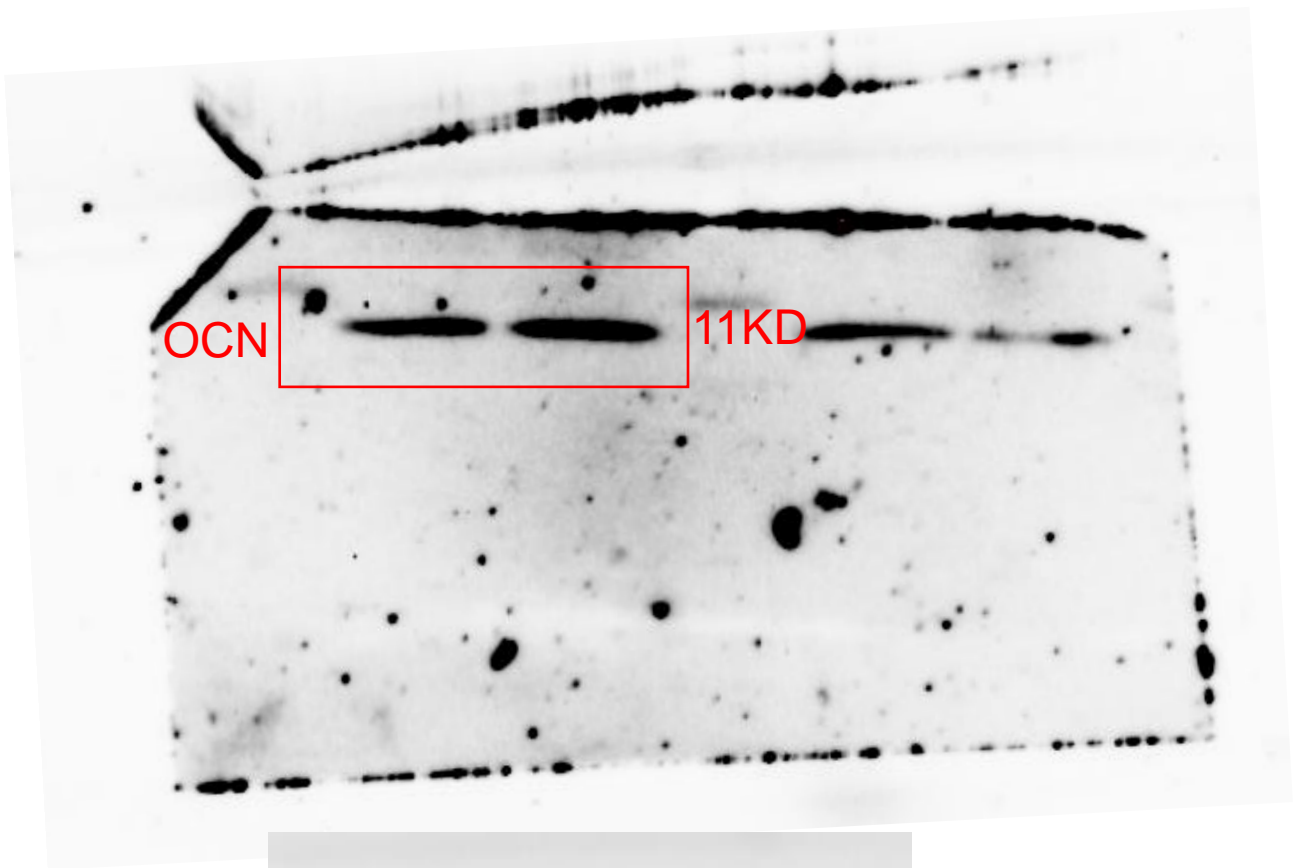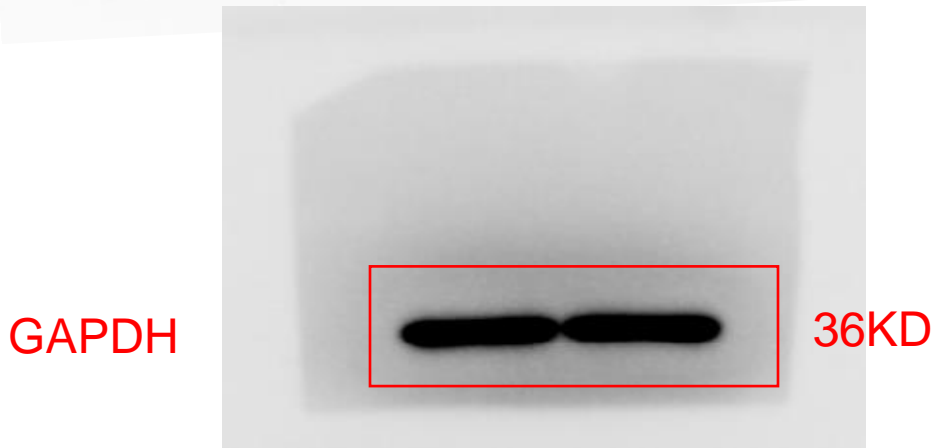

**Fig.6i**

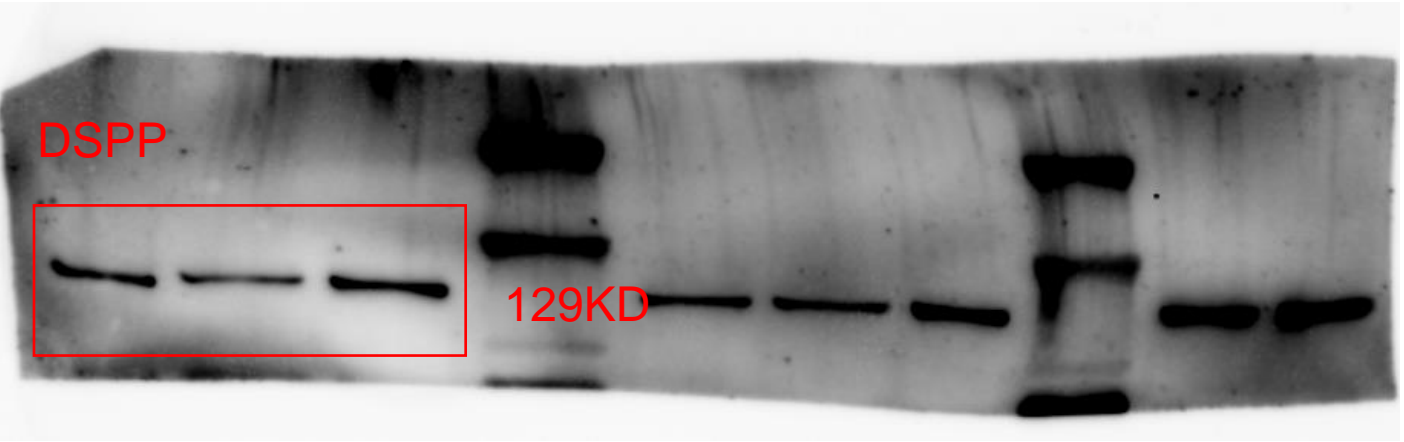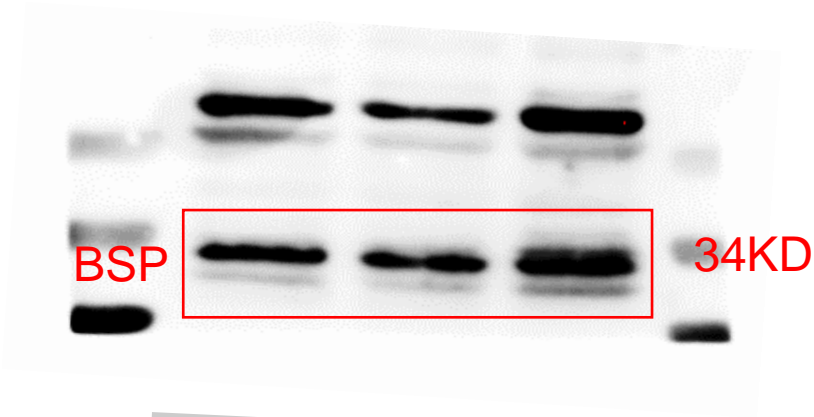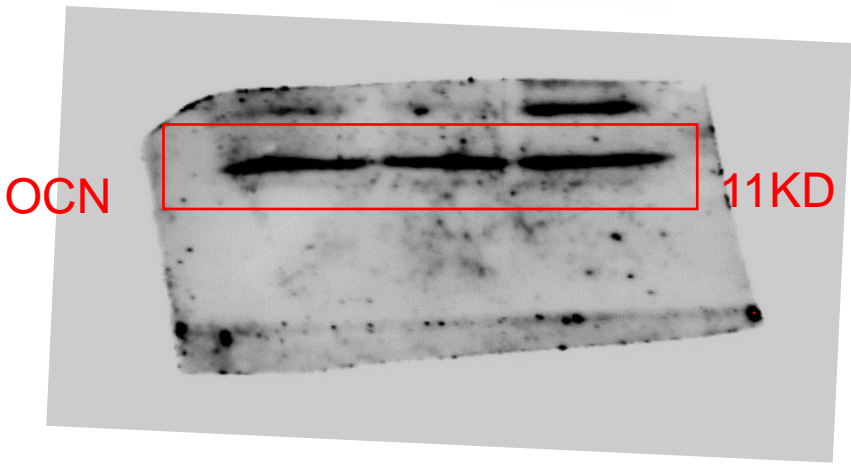

**Fig.6i**

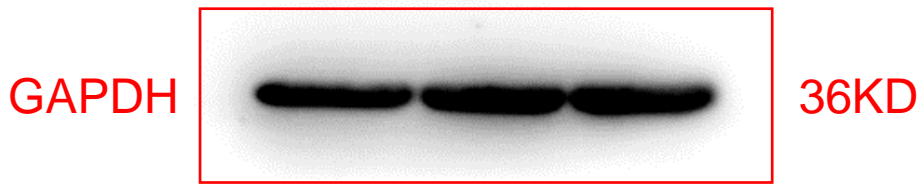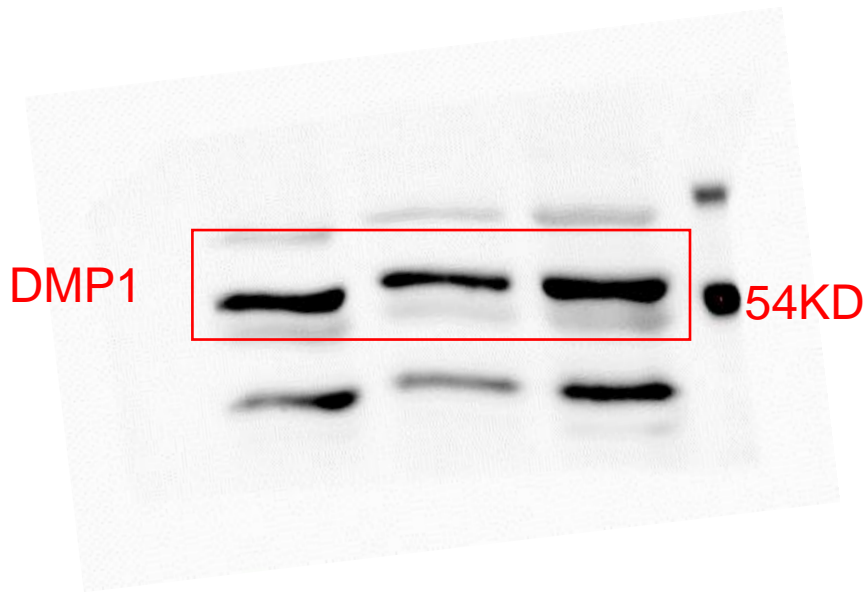

Supplement: 41368_2021_148_MOESM2_ESM.pdf [file 41368_2021_148_MOESM2_ESM.pdf]
